# Supplementary material
Source: publisher figshare collection journal article supplement (https://acs.figshare.com/ndownloader/files/3917410)
Supplement: Supplementary file 1 [file 3917410]

data_General
_audit_creation_date                    2013-09-30
_audit_creation_method                 'by CrystalStructure 4.0'
_audit_update_record                    ?

#==============================================================================
# PROCESSING SUMMARY (IUCr Office Use Only)

_journal_date_recd_electronic           ?
_journal_date_from_coeditor             ?
_journal_date_accepted                  ?
_journal_coeditor_code                  ?

#==============================================================================
# SUBMISSION DETAILS

_publ_contact_author_name              'ENTER NAME'
_publ_contact_author_email             'ENTER EMAIL ADDRESS'
_publ_contact_author_fax               'ENTER FAX NUMBER'
_publ_contact_author_phone             'ENTER PHONE NUMBER'
_publ_contact_letter
;
    ENTER TEXT OF LETTER
;
_publ_requested_journal                'ENTER JOURNAL NAME HERE'
_publ_requested_category               'CHOOSE FI FM FO CI CM CO or AD'
_publ_requested_coeditor_name           ?

#==============================================================================
# TITLE AND AUTHOR LIST

_publ_section_title
;
    ENTER SECTION TITLE
;
_publ_section_title_footnote
;
    ENTER FOOTNOTE TO TITLE OF PAPER
;
loop_
_publ_author_name
_publ_author_footnote
_publ_author_address
' FIRST AUTHORS NAME '
;
  FIRST AUTHORS FOOTNOTES
;
;
  FIRST AUTHORS ADDRESS
;
_publ_section_synopsis
;
    ENTER SYNOPSIS
;

#==============================================================================
# TEXT

_publ_section_abstract
;
    ENTER ABSTRACT
;
_publ_section_comment
;
    ENTER TEXT
;
_publ_section_references
;
    ENTER OTHER REFERENCES

    Rigaku (2010). CrystalStructure. Version 4.0. 
    Rigaku Corporation, Tokyo, Japan.

    Sheldrick, G.M. (2008).
    Acta Cryst. A64, 112-122.
    SHELX97

    Rigaku (1998). REQAB. 
    Rigaku Corporation, Tokyo, Japan.

;
_publ_section_figure_captions
;
    ENTER FIGURE CAPTIONS
;
_publ_section_exptl_prep
;
    ENTER COMPOUND PREPARATION DETAILS
;
_publ_section_exptl_refinement
;
    ENTER SPECIAL DETAILS OF THE REFINEMENT
;

#==============================================================================
data_1350a

#==============================================================================
# CHEMICAL DATA

_chemical_formula_sum                  'C13 H20 O4'
_chemical_formula_moiety               'C13 H20 O4'
_chemical_formula_weight                240.30
_chemical_melting_point                 ?
_chemical_absolute_configuration        ?

#==============================================================================
# CRYSTAL DATA
_symmetry_cell_setting                  monoclinic
_symmetry_space_group_name_H-M         'C 1 2 1'
_symmetry_space_group_name_Hall        'C 2y'
_symmetry_Int_Tables_number             5
loop_
_symmetry_equiv_pos_site_id
_symmetry_equiv_pos_as_xyz
1   '+X,+Y,+Z'
2   '-X,+Y,-Z'
3   '1/2+X,1/2+Y,+Z'
4   '1/2-X,1/2+Y,-Z'
#------------------------------------------------------------------------------
_cell_length_a                          9.981(13)
_cell_length_b                          8.448(10)
_cell_length_c                          15.97(2)
_cell_angle_alpha                       90.0000
_cell_angle_beta                        103.21(2)
_cell_angle_gamma                       90.0000
_cell_volume                            1311(3)
_cell_formula_units_Z                   4
_cell_measurement_reflns_used           2387
_cell_measurement_theta_min             3.20
_cell_measurement_theta_max             27.49
_cell_measurement_temperature           93
#------------------------------------------------------------------------------
_exptl_crystal_description              block
_exptl_crystal_colour                   colorless
_exptl_crystal_size_max                 0.160
_exptl_crystal_size_mid                 0.120
_exptl_crystal_size_min                 0.060
_exptl_crystal_density_diffrn           1.218
_exptl_crystal_density_meas             ?
_exptl_crystal_density_method          'not measured'
_exptl_crystal_F_000                    520.00
_exptl_absorpt_coefficient_mu           0.089
_exptl_absorpt_correction_type          multi-scan
_exptl_absorpt_process_details         'REQAB (Rigaku, 1998)'
_exptl_absorpt_correction_T_min         0.910
_exptl_absorpt_correction_T_max         0.995

#==============================================================================
# EXPERIMENTAL DATA

_diffrn_ambient_temperature             93
_diffrn_radiation_type                 'Mo K\a'
_diffrn_radiation_wavelength            0.71075
_diffrn_measurement_device_type        'Rigaku Saturn724'
_diffrn_measurement_method              \w
_diffrn_detector_area_resol_mean        7.111
_diffrn_reflns_number                   5444
_diffrn_reflns_av_R_equivalents         0.0415
_diffrn_reflns_theta_max                27.41
_diffrn_reflns_theta_full               27.41
_diffrn_measured_fraction_theta_max     0.996
_diffrn_measured_fraction_theta_full    0.996
_diffrn_reflns_limit_h_min             -12
_diffrn_reflns_limit_h_max              12
_diffrn_reflns_limit_k_min             -10
_diffrn_reflns_limit_k_max              10
_diffrn_reflns_limit_l_min             -20
_diffrn_reflns_limit_l_max              20
_diffrn_standards_number                0
_diffrn_standards_interval_count        .
_diffrn_standards_decay_%               ?

#==============================================================================
# REFINEMENT DATA

_refine_special_details
;
    Refinement was performed using all reflections. The weighted 
    R-factor (wR) and goodness of fit (S) are based on F^2^.
    R-factor (gt) are based on F. The threshold expression of
    F^2^ > 2.0 sigma(F^2^) is used only for calculating R-factor (gt).
;
_reflns_number_total                    1593
_reflns_number_gt                       1341
_reflns_threshold_expression            F^2^>2.0\s(F^2^)
_refine_ls_structure_factor_coef        Fsqd
_refine_ls_R_factor_gt                  0.0386
_refine_ls_wR_factor_ref                0.0830
_refine_ls_number_restraints            1
_refine_ls_hydrogen_treatment           constr
_refine_ls_number_reflns                1593
_refine_ls_number_parameters            154
_refine_ls_goodness_of_fit_ref          0.995
_refine_ls_weighting_scheme             calc
_refine_ls_weighting_details
           'w = 1/[\s^2^(Fo^2^)+(0.0422P)^2^+0.0000P] where P=(Fo^2^+2Fc^2^)/3'
_atom_sites_solution_hydrogens          geom
_atom_sites_solution_primary            direct
_atom_sites_solution_secondary          difmap
_refine_ls_shift/su_max                 0.000
_refine_diff_density_max                0.200
_refine_diff_density_min               -0.190
_refine_ls_extinction_method            none
_refine_ls_extinction_coef              ?
_refine_ls_abs_structure_details        ?
_refine_ls_abs_structure_Flack          ?

loop_
_atom_type_symbol
_atom_type_description
_atom_type_scat_dispersion_real
_atom_type_scat_dispersion_imag
_atom_type_scat_source
  'C' 'C'  0.0033 0.0016 
;
International Tables for Crystallography
(1992, Vol. C, Tables 4.2.6.8 and 6.1.1.4)
;
  'H' 'H'  0.0000 0.0000 
;
International Tables for Crystallography
(1992, Vol. C, Table 6.1.1.4)
;
  'O' 'O'  0.0106 0.0060 
;
International Tables for Crystallography
(1992, Vol. C, Tables 4.2.6.8 and 6.1.1.4)
;

#==============================================================================
# ATOMIC COORDINATES AND THERMAL PARAMETERS

loop_
_atom_site_label
_atom_site_type_symbol
_atom_site_fract_x
_atom_site_fract_y
_atom_site_fract_z
_atom_site_U_iso_or_equiv
_atom_site_adp_type
_atom_site_occupancy
_atom_site_symmetry_multiplicity
_atom_site_calc_flag
_atom_site_refinement_flags
_atom_site_disorder_assembly
_atom_site_disorder_group
 O1 O 0.39322(14) 0.50517(19) 0.26833(10) 0.0197(4) Uani 1.0 4 d . . .
 O2 O 0.50496(17) 0.6337(2) 0.38654(11) 0.0265(4) Uani 1.0 4 d . . .
 O3 O 0.10626(14) 0.50614(19) 0.30285(10) 0.0198(4) Uani 1.0 4 d . . .
 O4 O 0.03480(16) 0.70744(19) 0.37289(11) 0.0259(5) Uani 1.0 4 d . . .
 C1 C 0.2893(2) 0.3805(3) 0.24600(14) 0.0180(5) Uani 1.0 4 d . . .
 C2 C 0.2127(2) 0.3847(3) 0.31873(14) 0.0168(5) Uani 1.0 4 d . . .
 C3 C 0.3201(2) 0.4473(3) 0.39576(14) 0.0150(5) Uani 1.0 4 d . . .
 C4 C 0.4185(2) 0.5387(3) 0.35316(14) 0.0182(5) Uani 1.0 4 d . . .
 C5 C 0.2402(2) 0.5580(3) 0.44270(14) 0.0160(5) Uani 1.0 4 d . . .
 C6 C 0.1173(3) 0.6037(3) 0.37210(15) 0.0189(5) Uani 1.0 4 d . . .
 C7 C 0.1900(3) 0.4811(3) 0.51639(14) 0.0183(5) Uani 1.0 4 d . . .
 C8 C 0.2048(3) 0.4071(3) 0.15561(13) 0.0212(5) Uani 1.0 4 d . . .
 C9 C 0.2915(3) 0.3985(4) 0.08828(14) 0.0240(6) Uani 1.0 4 d . . .
 C10 C 0.2040(3) 0.4056(4) -0.00389(14) 0.0256(6) Uani 1.0 4 d . . .
 C11 C 0.2878(3) 0.4050(4) -0.07231(15) 0.0253(6) Uani 1.0 4 d . . .
 C12 C 0.1985(3) 0.4042(4) -0.16336(14) 0.0292(6) Uani 1.0 4 d . . .
 C13 C 0.2789(3) 0.4079(5) -0.23244(17) 0.0416(7) Uani 1.0 4 d . . .
 H1 H 0.3373 0.2763 0.2478 0.0216 Uiso 1.0 4 calc R . .
 H2 H 0.1763 0.2785 0.3301 0.0201 Uiso 1.0 4 calc R . .
 H3 H 0.3674 0.3602 0.4337 0.0180 Uiso 1.0 4 calc R . .
 H5 H 0.2966 0.6538 0.4638 0.0192 Uiso 1.0 4 calc R . .
 H7A H 0.2693 0.4512 0.5622 0.0220 Uiso 1.0 4 calc R . .
 H7B H 0.1360 0.3864 0.4953 0.0220 Uiso 1.0 4 calc R . .
 H7C H 0.1324 0.5563 0.5391 0.0220 Uiso 1.0 4 calc R . .
 H8A H 0.1603 0.5123 0.1525 0.0254 Uiso 1.0 4 calc R . .
 H8B H 0.1312 0.3262 0.1423 0.0254 Uiso 1.0 4 calc R . .
 H9A H 0.3449 0.2986 0.0961 0.0288 Uiso 1.0 4 calc R . .
 H9B H 0.3578 0.4875 0.0974 0.0288 Uiso 1.0 4 calc R . .
 H10A H 0.1407 0.3138 -0.0135 0.0307 Uiso 1.0 4 calc R . .
 H10B H 0.1471 0.5028 -0.0105 0.0307 Uiso 1.0 4 calc R . .
 H11A H 0.3479 0.3104 -0.0642 0.0303 Uiso 1.0 4 calc R . .
 H11B H 0.3477 0.4998 -0.0647 0.0303 Uiso 1.0 4 calc R . .
 H12A H 0.1403 0.3080 -0.1711 0.0350 Uiso 1.0 4 calc R . .
 H12B H 0.1365 0.4971 -0.1706 0.0350 Uiso 1.0 4 calc R . .
 H13A H 0.2151 0.4077 -0.2891 0.0499 Uiso 1.0 4 calc R . .
 H13B H 0.3385 0.3145 -0.2271 0.0499 Uiso 1.0 4 calc R . .
 H13C H 0.3355 0.5039 -0.2262 0.0499 Uiso 1.0 4 calc R . .


loop_
_atom_site_aniso_label
_atom_site_aniso_U_11
_atom_site_aniso_U_22
_atom_site_aniso_U_33
_atom_site_aniso_U_12
_atom_site_aniso_U_13
_atom_site_aniso_U_23
 O1 0.0170(8) 0.0252(9) 0.0174(8) -0.0014(8) 0.0048(7) 0.0026(7)
 O2 0.0202(9) 0.0329(10) 0.0257(10) -0.0079(8) 0.0038(8) -0.0004(8)
 O3 0.0133(7) 0.0271(9) 0.0185(9) 0.0054(8) 0.0024(6) 0.0018(7)
 O4 0.0229(9) 0.0281(9) 0.0284(11) 0.0121(9) 0.0091(8) 0.0079(8)
 C1 0.0165(10) 0.0195(12) 0.0189(12) 0.0023(10) 0.0056(9) -0.0004(10)
 C2 0.0153(10) 0.0178(12) 0.0175(12) 0.0019(10) 0.0042(9) 0.0019(10)
 C3 0.0125(10) 0.0152(12) 0.0168(11) 0.0019(9) 0.0026(9) 0.0015(9)
 C4 0.0129(10) 0.0214(13) 0.0191(12) 0.0048(11) 0.0011(9) 0.0032(10)
 C5 0.0153(11) 0.0143(11) 0.0180(12) 0.0013(10) 0.0028(9) 0.0006(9)
 C6 0.0177(11) 0.0204(12) 0.0211(13) 0.0008(11) 0.0097(10) 0.0059(10)
 C7 0.0175(11) 0.0196(12) 0.0177(11) 0.0024(10) 0.0037(9) 0.0017(10)
 C8 0.0200(11) 0.0295(13) 0.0140(12) 0.0035(12) 0.0039(9) -0.0016(11)
 C9 0.0215(11) 0.0326(13) 0.0186(12) 0.0015(12) 0.0057(10) -0.0013(11)
 C10 0.0249(12) 0.0347(14) 0.0166(12) 0.0028(12) 0.0037(10) 0.0007(11)
 C11 0.0255(12) 0.0330(13) 0.0171(12) 0.0005(13) 0.0046(10) -0.0014(11)
 C12 0.0322(14) 0.0365(15) 0.0178(13) 0.0018(14) 0.0037(11) 0.0004(12)
 C13 0.0449(16) 0.0552(18) 0.0264(15) 0.0017(17) 0.0118(13) -0.0003(15)

#==============================================================================
_computing_data_collection             'CrystalClear (Rigaku Inc., 2008)'
_computing_cell_refinement              CrystalClear
_computing_data_reduction               CrystalClear
_computing_structure_solution          'SHELXS97 (Sheldrick, 2008)'
_computing_structure_refinement        'SHELXL97 (Sheldrick, 2008)'
_computing_publication_material        'CrystalStructure 4.0 (Rigaku, 2010)'
_computing_molecular_graphics          'CrystalStructure 4.0'

#==============================================================================
# MOLECULAR GEOMETRY

_geom_special_details
;
    ENTER SPECIAL DETAILS OF THE MOLECULAR GEOMETRY
;

loop_
_geom_bond_atom_site_label_1
_geom_bond_atom_site_label_2
_geom_bond_distance
_geom_bond_publ_flag
_geom_bond_site_symmetry_1
_geom_bond_site_symmetry_2
O1 C1 1.464(3) yes . .
O1 C4 1.350(4) yes . .
O2 C4 1.209(3) yes . .
O3 C2 1.457(3) yes . .
O3 C6 1.363(3) yes . .
O4 C6 1.205(3) yes . .
C1 C2 1.529(4) yes . .
C1 C8 1.513(4) yes . .
C2 C3 1.529(3) yes . .
C3 C4 1.526(4) yes . .
C3 C5 1.532(4) yes . .
C5 C6 1.514(4) yes . .
C5 C7 1.525(4) yes . .
C8 C9 1.528(4) yes . .
C9 C10 1.532(4) yes . .
C10 C11 1.520(4) yes . .
C11 C12 1.522(4) yes . .
C12 C13 1.506(5) yes . .
C1 H1 1.000 no . .
C2 H2 1.000 no . .
C3 H3 1.000 no . .
C5 H5 1.000 no . .
C7 H7A 0.980 no . .
C7 H7B 0.980 no . .
C7 H7C 0.980 no . .
C8 H8A 0.990 no . .
C8 H8B 0.990 no . .
C9 H9A 0.990 no . .
C9 H9B 0.990 no . .
C10 H10A 0.990 no . .
C10 H10B 0.990 no . .
C11 H11A 0.990 no . .
C11 H11B 0.990 no . .
C12 H12A 0.990 no . .
C12 H12B 0.990 no . .
C13 H13A 0.980 no . .
C13 H13B 0.980 no . .
C13 H13C 0.980 no . .

loop_
_geom_angle_atom_site_label_1
_geom_angle_atom_site_label_2
_geom_angle_atom_site_label_3
_geom_angle
_geom_angle_publ_flag
_geom_angle_site_symmetry_1
_geom_angle_site_symmetry_2
_geom_angle_site_symmetry_3
C1 O1 C4 110.79(18) yes . . .
C2 O3 C6 111.35(16) yes . . .
O1 C1 C2 104.33(18) yes . . .
O1 C1 C8 109.57(19) yes . . .
C2 C1 C8 117.1(2) yes . . .
O3 C2 C1 110.80(19) yes . . .
O3 C2 C3 104.22(19) yes . . .
C1 C2 C3 103.8(2) yes . . .
C2 C3 C4 102.8(2) yes . . .
C2 C3 C5 104.87(19) yes . . .
C4 C3 C5 111.7(2) yes . . .
O1 C4 O2 122.2(3) yes . . .
O1 C4 C3 110.43(18) yes . . .
O2 C4 C3 127.3(3) yes . . .
C3 C5 C6 102.4(2) yes . . .
C3 C5 C7 114.7(2) yes . . .
C6 C5 C7 109.3(2) yes . . .
O3 C6 O4 121.3(2) yes . . .
O3 C6 C5 110.6(2) yes . . .
O4 C6 C5 128.1(3) yes . . .
C1 C8 C9 112.5(2) yes . . .
C8 C9 C10 112.6(2) yes . . .
C9 C10 C11 113.8(2) yes . . .
C10 C11 C12 112.9(2) yes . . .
C11 C12 C13 114.0(3) yes . . .
O1 C1 H1 108.523 no . . .
C2 C1 H1 108.534 no . . .
C8 C1 H1 108.522 no . . .
O3 C2 H2 112.462 no . . .
C1 C2 H2 112.465 no . . .
C3 C2 H2 112.463 no . . .
C2 C3 H3 112.309 no . . .
C4 C3 H3 112.304 no . . .
C5 C3 H3 112.304 no . . .
C3 C5 H5 110.058 no . . .
C6 C5 H5 110.063 no . . .
C7 C5 H5 110.066 no . . .
C5 C7 H7A 109.472 no . . .
C5 C7 H7B 109.480 no . . .
C5 C7 H7C 109.469 no . . .
H7A C7 H7B 109.469 no . . .
H7A C7 H7C 109.474 no . . .
H7B C7 H7C 109.464 no . . .
C1 C8 H8A 109.102 no . . .
C1 C8 H8B 109.098 no . . .
C9 C8 H8A 109.109 no . . .
C9 C8 H8B 109.101 no . . .
H8A C8 H8B 107.837 no . . .
C8 C9 H9A 109.088 no . . .
C8 C9 H9B 109.091 no . . .
C10 C9 H9A 109.087 no . . .
C10 C9 H9B 109.080 no . . .
H9A C9 H9B 107.830 no . . .
C9 C10 H10A 108.804 no . . .
C9 C10 H10B 108.798 no . . .
C11 C10 H10A 108.795 no . . .
C11 C10 H10B 108.790 no . . .
H10A C10 H10B 107.678 no . . .
C10 C11 H11A 109.008 no . . .
C10 C11 H11B 109.014 no . . .
C12 C11 H11A 109.020 no . . .
C12 C11 H11B 109.019 no . . .
H11A C11 H11B 107.795 no . . .
C11 C12 H12A 108.758 no . . .
C11 C12 H12B 108.758 no . . .
C13 C12 H12A 108.765 no . . .
C13 C12 H12B 108.768 no . . .
H12A C12 H12B 107.653 no . . .
C12 C13 H13A 109.467 no . . .
C12 C13 H13B 109.480 no . . .
C12 C13 H13C 109.469 no . . .
H13A C13 H13B 109.465 no . . .
H13A C13 H13C 109.471 no . . .
H13B C13 H13C 109.475 no . . .

loop_
_geom_torsion_atom_site_label_1
_geom_torsion_atom_site_label_2
_geom_torsion_atom_site_label_3
_geom_torsion_atom_site_label_4
_geom_torsion
_geom_torsion_publ_flag
_geom_torsion_site_symmetry_1
_geom_torsion_site_symmetry_2
_geom_torsion_site_symmetry_3
_geom_torsion_site_symmetry_4
C1 O1 C4 O2 176.94(18) no . . . .
C1 O1 C4 C3 -5.6(2) no . . . .
C4 O1 C1 C2 21.4(2) no . . . .
C4 O1 C1 C8 147.50(17) no . . . .
C2 O3 C6 O4 -176.7(2) no . . . .
C2 O3 C6 C5 1.9(3) no . . . .
C6 O3 C2 C1 -128.25(19) no . . . .
C6 O3 C2 C3 -17.2(3) no . . . .
O1 C1 C2 O3 83.39(19) no . . . .
O1 C1 C2 C3 -27.95(19) no . . . .
O1 C1 C8 C9 62.2(3) no . . . .
C2 C1 C8 C9 -179.35(17) no . . . .
C8 C1 C2 O3 -37.8(3) no . . . .
C8 C1 C2 C3 -149.19(19) no . . . .
O3 C2 C3 C4 -91.79(19) no . . . .
O3 C2 C3 C5 25.1(2) no . . . .
C1 C2 C3 C4 24.3(2) no . . . .
C1 C2 C3 C5 141.15(17) no . . . .
C2 C3 C4 O1 -12.4(3) no . . . .
C2 C3 C4 O2 164.8(2) no . . . .
C2 C3 C5 C6 -23.5(2) no . . . .
C2 C3 C5 C7 94.76(19) no . . . .
C4 C3 C5 C6 87.07(19) no . . . .
C4 C3 C5 C7 -154.67(15) no . . . .
C5 C3 C4 O1 -124.34(18) no . . . .
C5 C3 C4 O2 52.9(3) no . . . .
C3 C5 C6 O3 14.0(3) no . . . .
C3 C5 C6 O4 -167.5(3) no . . . .
C7 C5 C6 O3 -108.0(3) no . . . .
C7 C5 C6 O4 70.5(3) no . . . .
C1 C8 C9 C10 173.18(19) no . . . .
C8 C9 C10 C11 177.3(2) no . . . .
C9 C10 C11 C12 177.2(3) no . . . .
C10 C11 C12 C13 178.5(3) no . . . .

loop_
_geom_contact_atom_site_label_1
_geom_contact_atom_site_label_2
_geom_contact_distance
_geom_contact_publ_flag
_geom_contact_site_symmetry_1
_geom_contact_site_symmetry_2
O1 O3 3.038(5) no . .
O1 C5 3.497(5) no . .
O1 C9 2.962(5) no . .
O2 C1 3.470(4) no . .
O2 C2 3.558(4) no . .
O2 C5 3.047(5) no . .
O3 C4 3.048(5) no . .
O3 C7 3.327(5) no . .
O3 C8 2.873(4) no . .
O4 C2 3.470(4) no . .
O4 C3 3.550(5) no . .
O4 C7 3.112(4) no . .
C1 C6 3.484(5) no . .
C2 C7 3.317(5) no . .
C4 C6 3.138(5) no . .
C4 C8 3.558(5) no . .
O1 O4 3.167(4) no . 3_545
O1 C13 3.546(6) no . 2_655
O2 C2 3.316(4) no . 3_555
O2 C5 3.338(4) no . 2_656
O2 C7 3.343(5) no . 2_656
O3 C12 3.443(4) no . 2_555
O4 O1 3.167(4) no . 3_455
O4 C1 3.159(4) no . 3_455
O4 C2 3.472(5) no . 3_455
O4 C3 3.031(4) no . 3_455
O4 C4 3.019(4) no . 3_455
C1 O4 3.159(4) no . 3_545
C2 O2 3.316(4) no . 3_445
C2 O4 3.472(5) no . 3_545
C3 O4 3.031(4) no . 3_545
C4 O4 3.019(4) no . 3_545
C5 O2 3.338(4) no . 2_656
C7 O2 3.343(5) no . 2_656
C12 O3 3.443(4) no . 2_555
C13 O1 3.546(6) no . 2_655
O1 H2 3.2099 no . .
O1 H3 2.9745 no . .
O1 H8A 2.6202 no . .
O1 H8B 3.2819 no . .
O1 H9A 3.1992 no . .
O1 H9B 2.6748 no . .
O2 H3 2.8744 no . .
O2 H5 2.6554 no . .
O3 H1 3.2848 no . .
O3 H3 3.1923 no . .
O3 H5 3.0889 no . .
O3 H7B 3.1833 no . .
O3 H8A 2.5785 no . .
O3 H8B 3.0399 no . .
O4 H5 2.7218 no . .
O4 H7B 3.3602 no . .
O4 H7C 2.9055 no . .
C1 H3 2.9240 no . .
C1 H9A 2.6692 no . .
C1 H9B 2.7669 no . .
C2 H5 3.2176 no . .
C2 H7B 3.0852 no . .
C2 H8A 2.8012 no . .
C2 H8B 2.7925 no . .
C3 H1 2.8074 no . .
C3 H7A 2.8166 no . .
C3 H7B 2.7386 no . .
C3 H7C 3.3996 no . .
C4 H1 2.7890 no . .
C4 H2 3.2262 no . .
C4 H5 2.5559 no . .
C5 H2 2.9483 no . .
C6 H2 2.9198 no . .
C6 H3 3.2110 no . .
C6 H7A 3.3267 no . .
C6 H7B 2.6650 no . .
C6 H7C 2.6664 no . .
C7 H2 3.4081 no . .
C7 H3 2.6444 no . .
C8 H2 3.0630 no . .
C8 H10A 2.7448 no . .
C8 H10B 2.7060 no . .
C9 H1 2.6894 no . .
C9 H11A 2.7250 no . .
C9 H11B 2.7645 no . .
C10 H8A 2.7812 no . .
C10 H8B 2.6829 no . .
C10 H12A 2.7267 no . .
C10 H12B 2.7050 no . .
C11 H9A 2.7679 no . .
C11 H9B 2.7298 no . .
C11 H13A 3.3705 no . .
C11 H13B 2.7420 no . .
C11 H13C 2.7374 no . .
C12 H10A 2.6965 no . .
C12 H10B 2.7363 no . .
C13 H11A 2.7423 no . .
C13 H11B 2.7211 no . .
H1 H2 2.2965 no . .
H1 H3 2.9987 no . .
H1 H8A 2.8613 no . .
H1 H8B 2.3804 no . .
H1 H9A 2.4487 no . .
H1 H9B 3.0362 no . .
H2 H3 2.3264 no . .
H2 H7B 2.9046 no . .
H2 H8A 3.4289 no . .
H2 H8B 2.9563 no . .
H3 H5 2.6533 no . .
H3 H7A 2.5839 no . .
H3 H7B 2.7183 no . .
H3 H7C 3.5896 no . .
H5 H7A 2.3796 no . .
H5 H7B 2.8791 no . .
H5 H7C 2.3893 no . .
H8A H9A 2.8677 no . .
H8A H9B 2.3447 no . .
H8A H10A 3.1048 no . .
H8A H10B 2.5768 no . .
H8B H9A 2.4219 no . .
H8B H9B 2.8678 no . .
H8B H10A 2.5129 no . .
H8B H10B 2.8946 no . .
H9A H10A 2.3675 no . .
H9A H10B 2.8692 no . .
H9A H11A 2.5686 no . .
H9A H11B 3.0845 no . .
H9B H10A 2.8693 no . .
H9B H10B 2.3980 no . .
H9B H11A 2.9651 no . .
H9B H11B 2.5700 no . .
H10A H11A 2.3874 no . .
H10A H11B 2.8598 no . .
H10A H12A 2.5153 no . .
H10A H12B 2.9397 no . .
H10B H11A 2.8599 no . .
H10B H11B 2.3557 no . .
H10B H12A 3.0346 no . .
H10B H12B 2.5347 no . .
H11A H12A 2.3641 no . .
H11A H12B 2.8610 no . .
H11A H13B 2.5802 no . .
H11A H13C 3.0372 no . .
H11B H12A 2.8611 no . .
H11B H12B 2.3813 no . .
H11B H13B 3.0113 no . .
H11B H13C 2.5526 no . .
H12A H13A 2.3368 no . .
H12A H13B 2.3503 no . .
H12A H13C 2.8442 no . .
H12B H13A 2.3334 no . .
H12B H13B 2.8442 no . .
H12B H13C 2.3536 no . .
O1 H12A 2.9716 no . 4_555
O1 H13B 3.3178 no . 2_655
O1 H13B 3.4516 no . 4_555
O1 H13C 2.9361 no . 2_655
O2 H2 2.4367 no . 3_555
O2 H5 2.7378 no . 2_656
O2 H7A 2.6979 no . 2_656
O2 H7B 2.8716 no . 3_555
O2 H7B 3.3637 no . 4_556
O2 H13A 3.3227 no . 4_555
O2 H13C 3.4876 no . 2_655
O3 H1 3.4793 no . 3_455
O3 H12A 3.3041 no . 2_555
O3 H12B 2.8280 no . 2_555
O3 H13A 3.2718 no . 2_555
O3 H13B 2.9763 no . 4_555
O4 H1 2.5319 no . 3_455
O4 H2 3.5377 no . 3_455
O4 H3 2.4777 no . 3_455
O4 H3 3.2831 no . 4_556
O4 H7A 2.8655 no . 4_556
O4 H7C 2.7319 no . 2_556
O4 H13A 3.5913 no . 2_555
O4 H13A 3.5231 no . 4_555
O4 H13B 3.0308 no . 4_555
C1 H12B 3.5909 no . 4_545
C1 H13C 3.4049 no . 4_545
C2 H13C 3.5272 no . 4_545
C3 H7C 3.4631 no . 4_546
C4 H2 3.3602 no . 3_555
C4 H7A 3.1868 no . 2_656
C4 H13A 3.4521 no . 4_555
C4 H13C 3.5363 no . 2_655
C5 H3 3.5408 no . 4_556
C5 H7A 3.3238 no . 4_556
C5 H7B 3.1062 no . 4_556
C6 H1 3.3667 no . 3_455
C6 H7A 3.2341 no . 4_556
C6 H7C 3.1617 no . 2_556
C6 H13A 3.4882 no . 4_555
C6 H13B 3.0328 no . 4_555
C7 H2 3.5509 no . 4_556
C7 H3 3.3808 no . 4_556
C7 H5 2.7827 no . 4_546
C7 H7B 3.3148 no . 2_556
C7 H7C 3.2002 no . 2_556
C7 H13A 3.1207 no . 1_556
C8 H12B 3.5516 no . 2_555
C10 H10A 3.5982 no . 2_555
C11 H9A 3.5672 no . 4_555
C12 H1 3.4069 no . 4_555
C12 H8A 3.5872 no . 4_545
C12 H8B 3.4474 no . 2_555
C12 H9A 3.5580 no . 4_555
C13 H1 3.3109 no . 4_555
C13 H2 3.5709 no . 4_555
C13 H7A 3.2798 no . 1_554
C13 H8A 3.5796 no . 4_545
H1 O3 3.4793 no . 3_545
H1 O4 2.5319 no . 3_545
H1 C6 3.3667 no . 3_545
H1 C12 3.4069 no . 4_545
H1 C13 3.3109 no . 4_545
H1 H12B 2.7013 no . 4_545
H1 H13A 3.2496 no . 4_545
H1 H13B 3.3426 no . 2_655
H1 H13C 2.8492 no . 4_545
H2 O2 2.4367 no . 3_445
H2 O4 3.5377 no . 3_545
H2 C4 3.3602 no . 3_445
H2 C7 3.5509 no . 4_546
H2 C13 3.5709 no . 4_545
H2 H5 3.4067 no . 4_546
H2 H7A 3.2363 no . 4_546
H2 H7C 3.1165 no . 4_546
H2 H12A 3.5807 no . 2_555
H2 H13A 3.4263 no . 4_545
H2 H13C 2.8389 no . 4_545
H3 O4 2.4777 no . 3_545
H3 O4 3.2831 no . 4_546
H3 C5 3.5408 no . 4_546
H3 C7 3.3808 no . 4_546
H3 H3 2.9876 no . 2_656
H3 H5 3.1020 no . 4_546
H3 H7C 2.6041 no . 4_546
H5 O2 2.7378 no . 2_656
H5 C7 2.7827 no . 4_556
H5 H2 3.4067 no . 4_556
H5 H3 3.1020 no . 4_556
H5 H7A 2.6064 no . 4_556
H5 H7B 2.1307 no . 4_556
H5 H7C 3.4755 no . 4_556
H5 H13A 3.5004 no . 4_555
H7A O2 2.6979 no . 2_656
H7A O4 2.8655 no . 4_546
H7A C4 3.1868 no . 2_656
H7A C5 3.3238 no . 4_546
H7A C6 3.2341 no . 4_546
H7A C13 3.2798 no . 1_556
H7A H2 3.2363 no . 4_556
H7A H5 2.6064 no . 4_546
H7A H13A 2.5803 no . 1_556
H7A H13B 3.4753 no . 1_556
H7A H13C 3.3224 no . 1_556
H7B O2 2.8716 no . 3_445
H7B O2 3.3637 no . 4_546
H7B C5 3.1062 no . 4_546
H7B C7 3.3148 no . 2_556
H7B H5 2.1307 no . 4_546
H7B H7B 2.7541 no . 2_556
H7B H7C 2.9777 no . 2_556
H7B H13A 3.3569 no . 1_556
H7C O4 2.7319 no . 2_556
H7C C3 3.4631 no . 4_556
H7C C6 3.1617 no . 2_556
H7C C7 3.2002 no . 2_556
H7C H2 3.1165 no . 4_556
H7C H3 2.6041 no . 4_556
H7C H5 3.4755 no . 4_546
H7C H7B 2.9777 no . 2_556
H7C H7C 2.6527 no . 2_556
H7C H13A 2.9576 no . 1_556
H8A C12 3.5872 no . 4_555
H8A C13 3.5796 no . 4_555
H8A H10B 3.3736 no . 2_555
H8A H11A 2.8783 no . 4_555
H8A H12A 3.5315 no . 2_555
H8A H12A 3.1659 no . 4_555
H8A H12B 3.0438 no . 2_555
H8A H13B 2.8157 no . 4_555
H8B C12 3.4474 no . 2_555
H8B H10A 3.0083 no . 2_555
H8B H10B 3.4208 no . 2_555
H8B H11B 3.0494 no . 4_545
H8B H12A 2.8547 no . 2_555
H8B H12B 3.1597 no . 2_555
H8B H12B 3.5814 no . 4_545
H8B H13C 3.0193 no . 4_545
H9A C11 3.5672 no . 4_545
H9A C12 3.5580 no . 4_545
H9A H10B 2.8580 no . 4_545
H9A H11A 3.2224 no . 2_655
H9A H11B 3.1432 no . 4_545
H9A H12B 2.7995 no . 4_545
H9A H13B 3.3699 no . 2_655
H9B H10A 3.0666 no . 4_555
H9B H11A 3.4437 no . 2_655
H9B H11A 3.3825 no . 4_555
H9B H11B 3.1027 no . 2_655
H9B H12A 2.9506 no . 4_555
H9B H13B 3.5696 no . 2_655
H9B H13C 3.2775 no . 2_655
H10A C10 3.5982 no . 2_555
H10A H8B 3.0083 no . 2_555
H10A H9B 3.0666 no . 4_545
H10A H10A 2.9367 no . 2_555
H10A H10B 3.3841 no . 2_555
H10A H10B 3.3412 no . 4_545
H10A H11B 2.9235 no . 4_545
H10B H8A 3.3736 no . 2_555
H10B H8B 3.4208 no . 2_555
H10B H9A 2.8580 no . 4_555
H10B H10A 3.3841 no . 2_555
H10B H10A 3.3412 no . 4_555
H10B H10B 3.0314 no . 2_555
H10B H11A 2.8549 no . 4_555
H11A H8A 2.8783 no . 4_545
H11A H9A 3.2224 no . 2_655
H11A H9B 3.4437 no . 2_655
H11A H9B 3.3825 no . 4_545
H11A H10B 2.8549 no . 4_545
H11A H11A 3.2529 no . 2_655
H11B H8B 3.0494 no . 4_555
H11B H9A 3.1432 no . 4_555
H11B H9B 3.1027 no . 2_655
H11B H10A 2.9235 no . 4_555
H11B H11B 3.2632 no . 2_655
H12A O1 2.9716 no . 4_545
H12A O3 3.3041 no . 2_555
H12A H2 3.5807 no . 2_555
H12A H8A 3.5315 no . 2_555
H12A H8A 3.1659 no . 4_545
H12A H8B 2.8547 no . 2_555
H12A H9B 2.9506 no . 4_545
H12B O3 2.8280 no . 2_555
H12B C1 3.5909 no . 4_555
H12B C8 3.5516 no . 2_555
H12B H1 2.7013 no . 4_555
H12B H8A 3.0438 no . 2_555
H12B H8B 3.1597 no . 2_555
H12B H8B 3.5814 no . 4_555
H12B H9A 2.7995 no . 4_555
H13A O2 3.3227 no . 4_545
H13A O3 3.2718 no . 2_555
H13A O4 3.5913 no . 2_555
H13A O4 3.5231 no . 4_545
H13A C4 3.4521 no . 4_545
H13A C6 3.4882 no . 4_545
H13A C7 3.1207 no . 1_554
H13A H1 3.2496 no . 4_555
H13A H2 3.4263 no . 4_555
H13A H5 3.5004 no . 4_545
H13A H7A 2.5803 no . 1_554
H13A H7B 3.3569 no . 1_554
H13A H7C 2.9576 no . 1_554
H13B O1 3.3178 no . 2_655
H13B O1 3.4516 no . 4_545
H13B O3 2.9763 no . 4_545
H13B O4 3.0308 no . 4_545
H13B C6 3.0328 no . 4_545
H13B H1 3.3426 no . 2_655
H13B H7A 3.4753 no . 1_554
H13B H8A 2.8157 no . 4_545
H13B H9A 3.3699 no . 2_655
H13B H9B 3.5696 no . 2_655
H13C O1 2.9361 no . 2_655
H13C O2 3.4876 no . 2_655
H13C C1 3.4049 no . 4_555
H13C C2 3.5272 no . 4_555
H13C C4 3.5363 no . 2_655
H13C H1 2.8492 no . 4_555
H13C H2 2.8389 no . 4_555
H13C H7A 3.3224 no . 1_554
H13C H8B 3.0193 no . 4_555
H13C H9B 3.2775 no . 2_655

#==============================================================================

#==============================================================================
# Additional structures and associated data_? identifiers
# should be added at this point if there is more than one 
# structure analysis in the CIF.

#==============================================================================
#     End of CIF
#==============================================================================
